# Supplementary material for: Encapsulation of organic active materials in carbon nanotubes for application to high-electrochemical-performance sodium batteries
Source: Royal Society of Chemistry journal article supplement (doi:10.1039/c5ee02806j), 2015-11-10
Supplement: c5ee02806j1.pdf [file c5ee02806j1.pdf]

## Supplementary Information

### Encapsulation of Organic Active Material in Carbon Nanotubes for Application to High-Electrochemical-Performance Sodium Batteries

*Jae-Kwang Kim,<sup>a,\*</sup> Yongli Kim<sup>b</sup>, Seung-Young Park<sup>b</sup>, Hyunhyub Ko<sup>b</sup> and Youngsik Kim<sup>b,\*</sup>*

<sup>a</sup> Department of Solar & Energy Engineering, Cheongju University, Cheongju, Chungbuk 360-764, Republic of Korea. E-mail: [jaekwang@cju.ac.kr](mailto:jaekwang@cju.ac.kr)

<sup>b</sup> School of Energy & Chemical Engineering, Ulsan National Institute of Science and Technology (UNIST), 689-798 Ulsan, Republic of Korea. E-mail: [ykim@unist.ac.kr](mailto:ykim@unist.ac.kr)  
E-mail: [jaekwang@cju.ac.kr](mailto:jaekwang@cju.ac.kr) (J. Kim), [ykim@unist.ac.kr](mailto:ykim@unist.ac.kr) (Y. Kim)

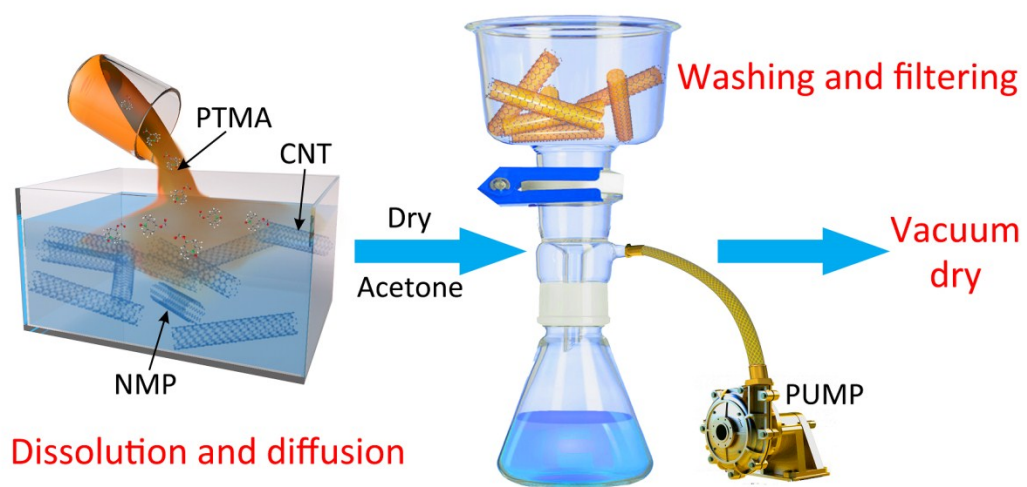

**Fig. S1.** Schematic diagram for the preparation of PTMA-impregnated CNT.

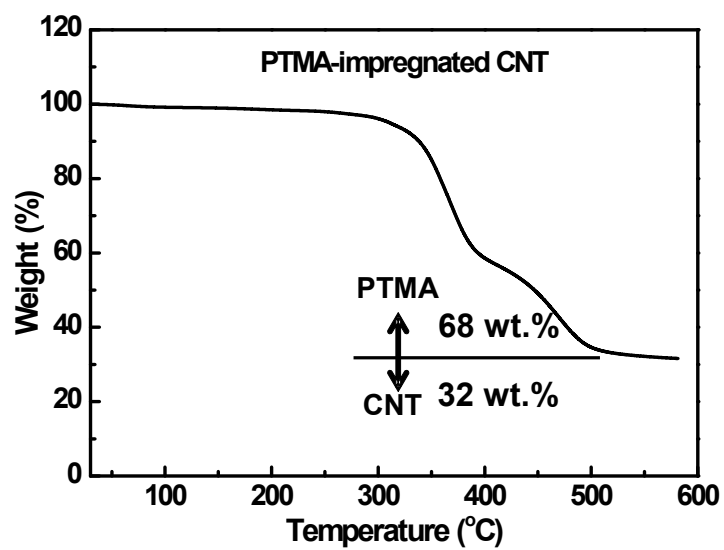

**Fig. S2.** TGA curve of the PTMA-impregnated CNT.

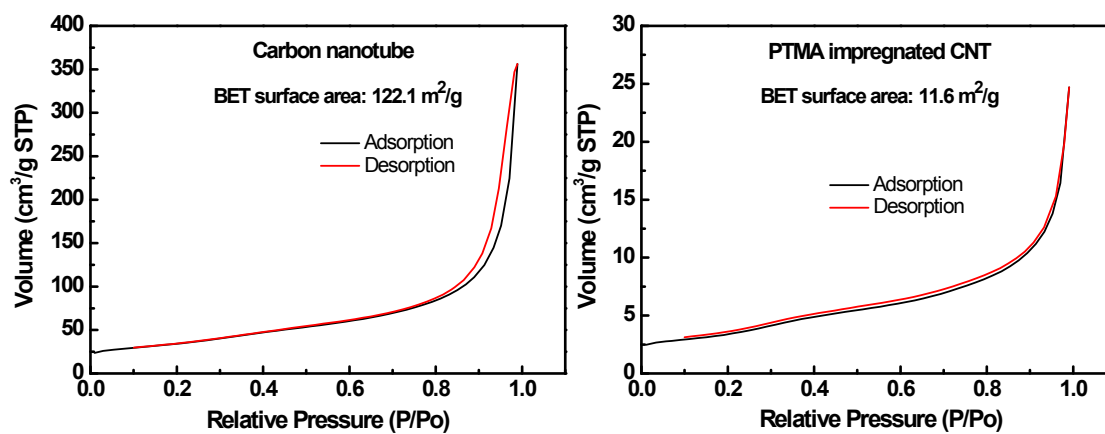

Fig. S3. BET surface area of CNT and PTMA-impregnated CNT.

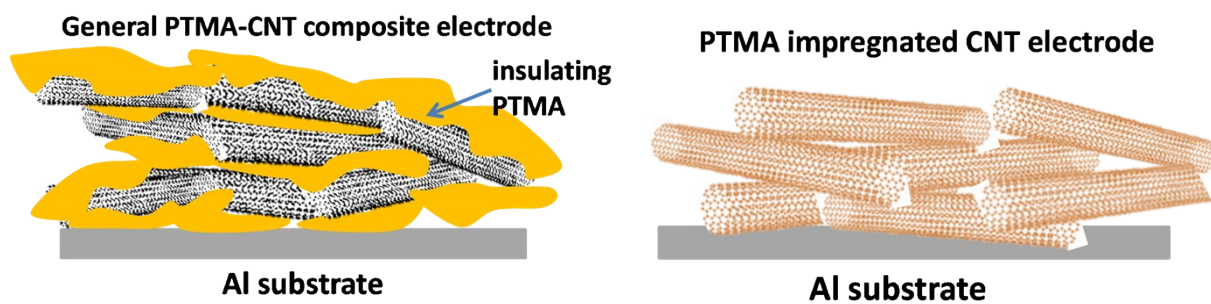

**Fig. S4.** Schematic illustration of PTMA-CNT composite and PTMA-impregnated CNT electrodes.

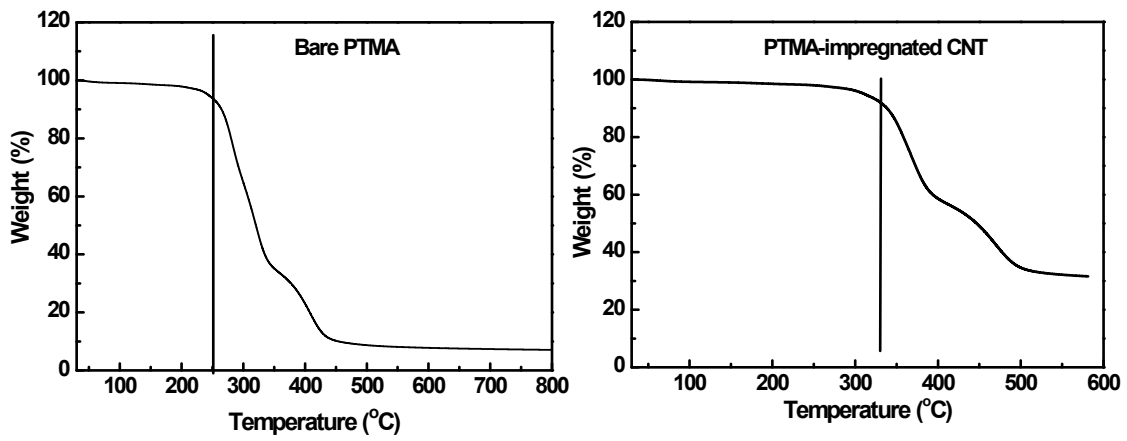

**Fig. S5.** TGA curves of the bare PTMA and PTMA-impregnated CNT.

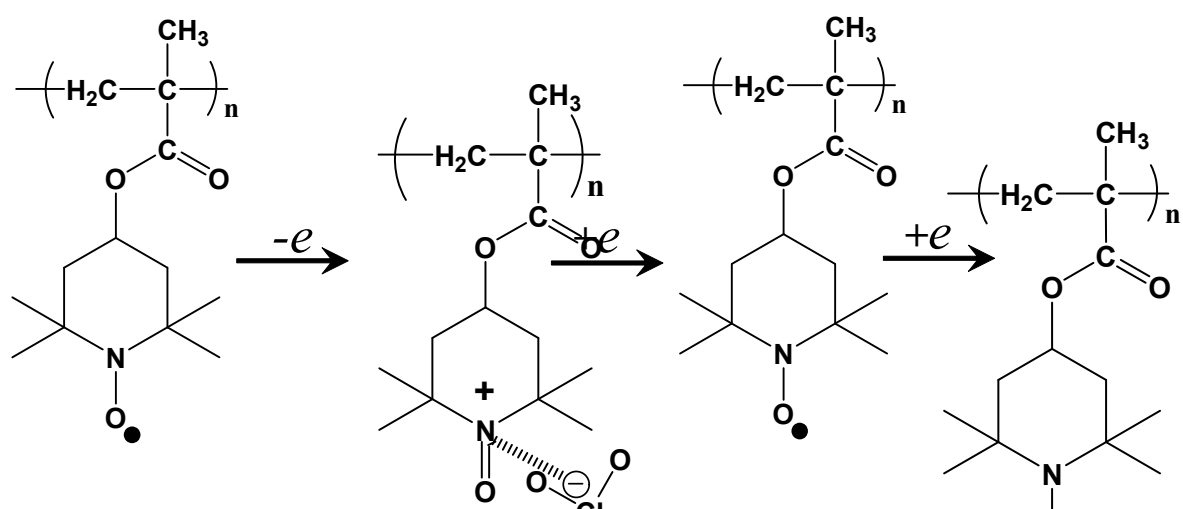

**Fig. S6.** Electrochemical reaction mechanism of PTMA at initial charge-discharge process.

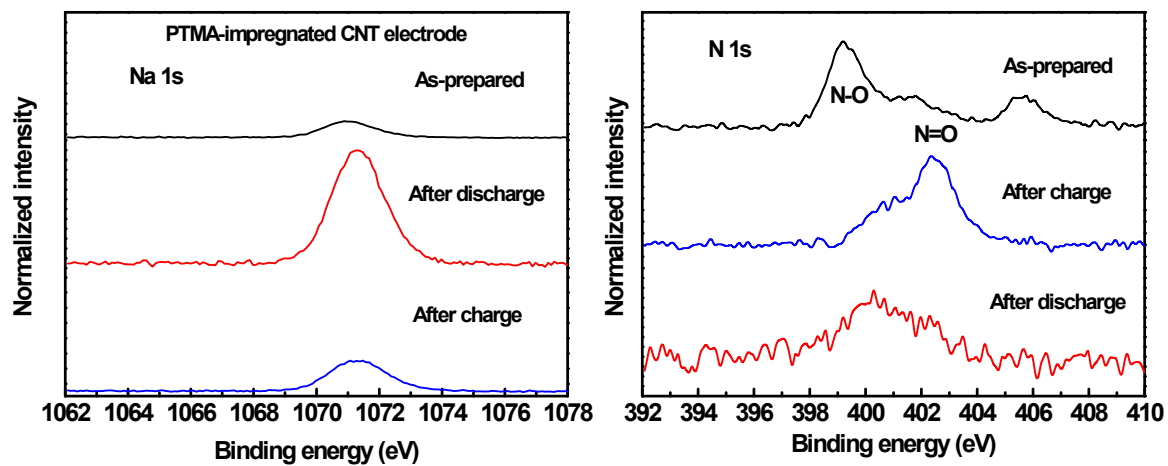

**Fig. S7.** Ex-situ XPS of Na 1s (b) and N 1s in PTMA-impregnated CNT electrodes.



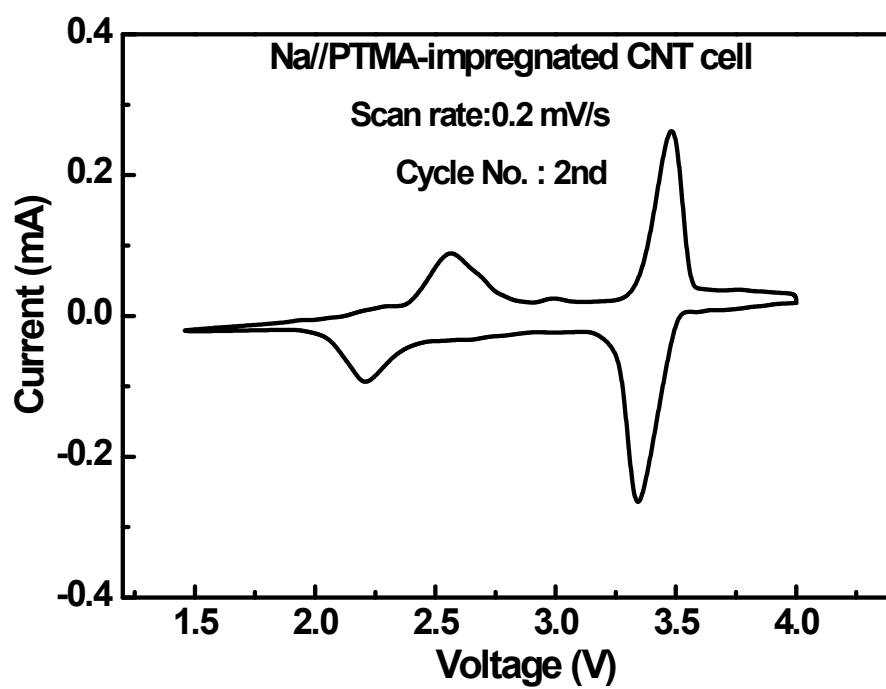

**Fig. S8.** Cyclic voltammograms (CV) of PTMA-impregnated CNT sodium cell at a scan rate of 0.2 mV s<sup>-1</sup>.

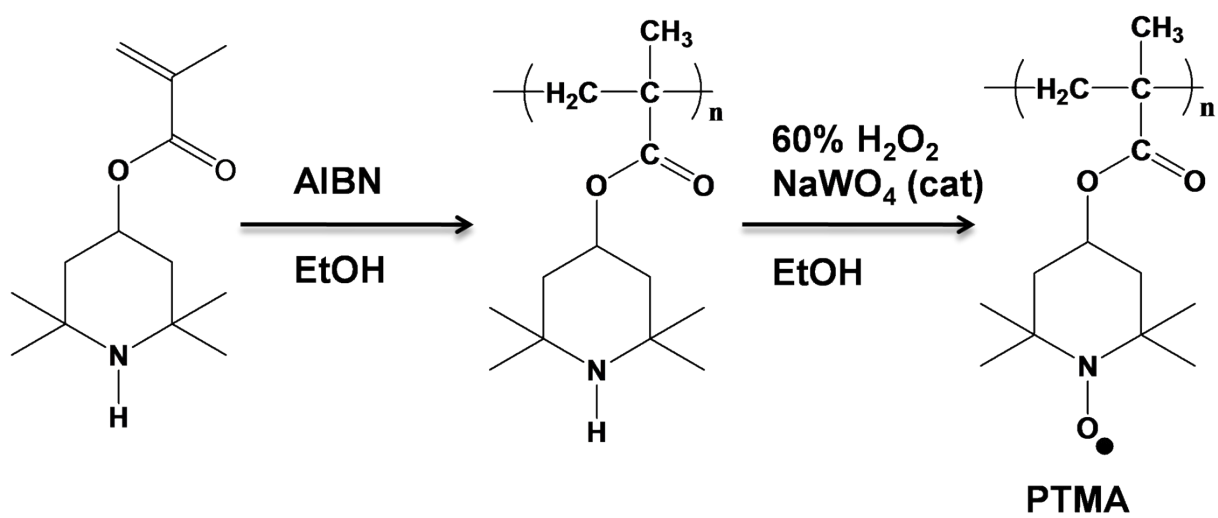

**Fig. S9.** Preparation of PTMA by the radical polymerization method.

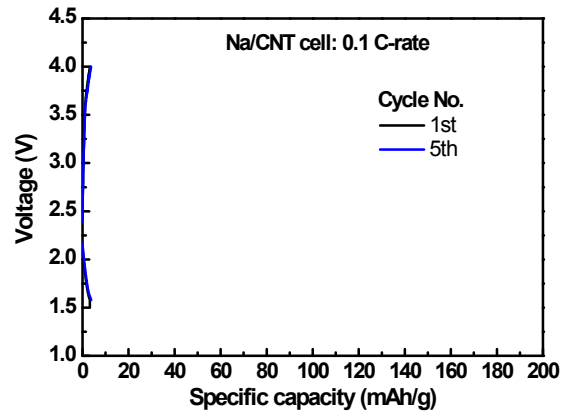

**Fig. S10.** Charge-discharge curves of Na/CNT cell at same current density with PTMA-impregnated CNT cell.

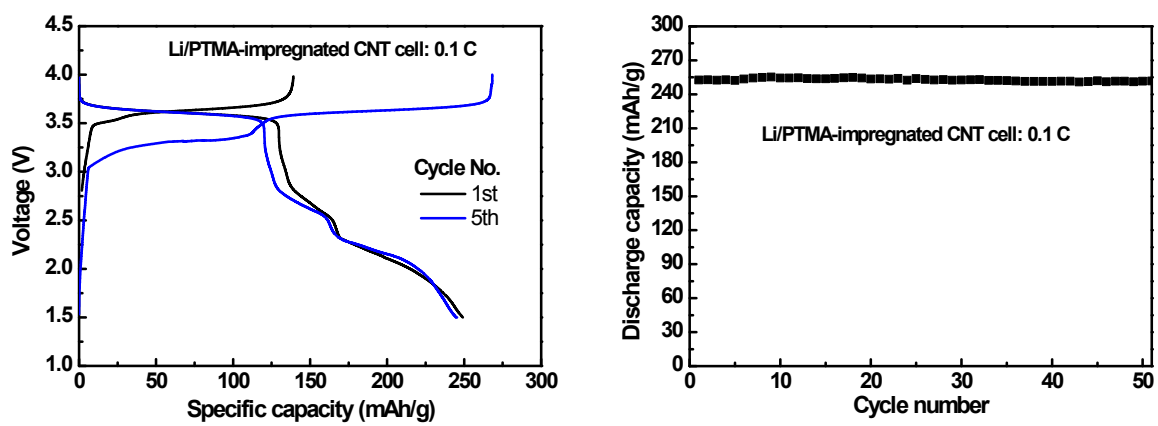

**Fig. S11.** Charge-discharge curves and cycle performance of the PTMA-impregnated CNT electrode on lithium battery at room temperature.
